# Supplementary material
Source: PubMed Central journal article supplement (PMC5289227)
Supplement: NIHMS813471-supplement-Suppl_Info.pdf [file NIHMS813471-supplement-Suppl_Info.pdf]

**PD-L1 detection in tumors using [<sup>64</sup>Cu]atezolizumab with PET  
Supporting Information**

Wojciech G. Lesniak<sup>1†</sup>, Samit Chatterjee<sup>1†</sup>, Matthew Gabrielson<sup>1</sup>, Ala Lisok<sup>1</sup>, Bryan Wharram<sup>1</sup>,  
Martin G. Pomper<sup>1,2</sup> and Sridhar Nimmagadda<sup>1,2\*</sup>

<sup>1</sup>Russell H. Morgan Department of Radiology and Radiological Science, Johns Hopkins University, Baltimore, MD, USA.

<sup>2</sup>Sidney Kimmel Comprehensive Cancer Center, Johns Hopkins University, Baltimore, MD, USA.

**List of contents:**

Scheme S1. Radiolabeling of atezolizumab.

Figure S1. Physicochemical characterization of atezolizumab-DOTAGA conjugate.

Figure S2. Integrity of [ $^{64}\text{Cu}$ ]atezolizumab.

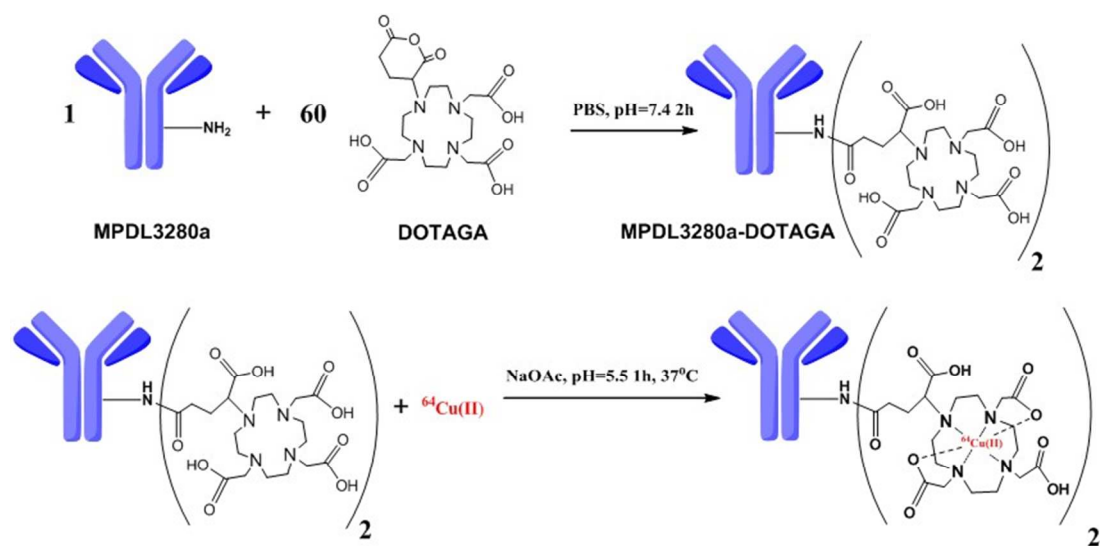

**Scheme S1.** Radiolabeling of atezolizumab.

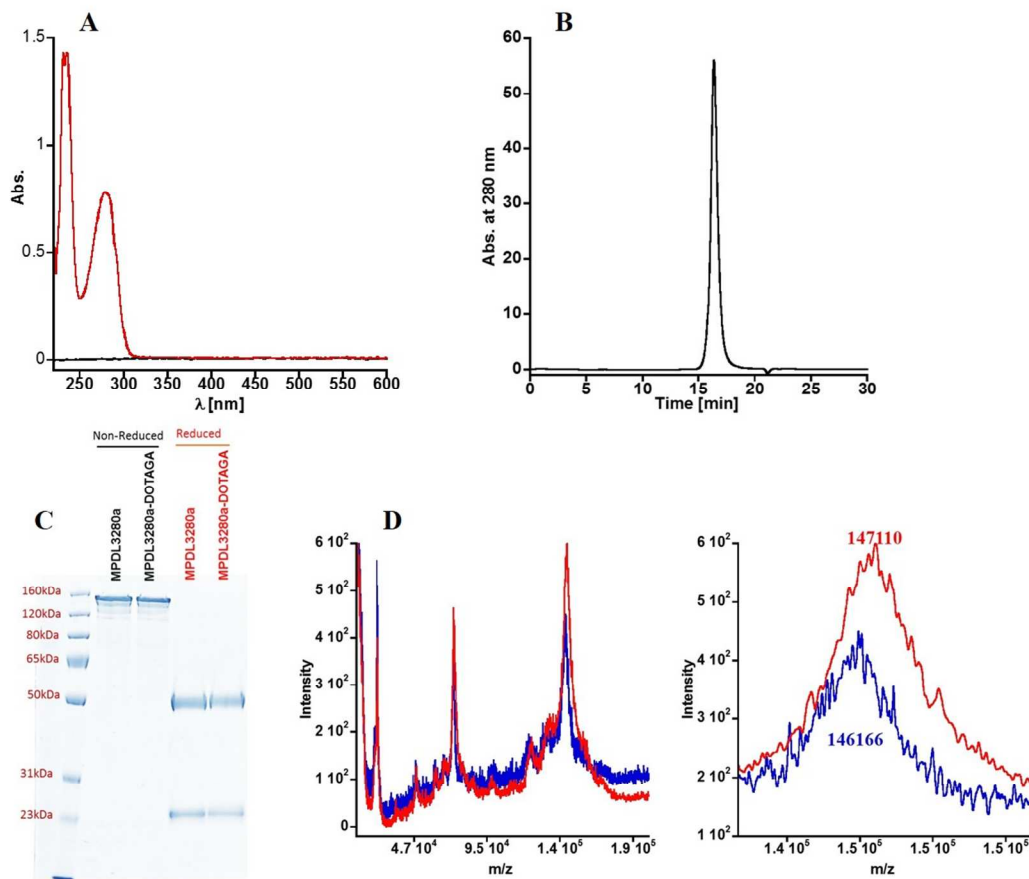

**Figure S1. Physicochemical characterization of atezolizumab-DOTAGA conjugate.** (A) UV-Vis spectroscopy recorded on a Nanodrop 2000 was used to obtain the concentration of atezolizumab-DOTAGA; (B) Size Exclusion Chromatography (SEC) performed using a Waters XBridge BEH200A SEC 3.5  $\mu$ m, 7.8x300 mm column and phosphate buffer (0.1M, pH=6.8) at flow rate of 0.5 mL/min shows narrow molecular weight distribution; (C) SDS-PAGE analysis indicating high purity and integrity of atezolizumab and atezolizumab-DOTAGA (D) Matrix-Assisted Laser Desorption Ionization Time-of-Flight spectroscopy of atezolizumab (blue line) and atezolizumab-DOTAGA (red line) shows increased molecular weight upon conjugation of DOTAGA to atezolizumab. Increased molecular weight corresponds to two molecules of DOTAGA.

## Supplementary Figure 2

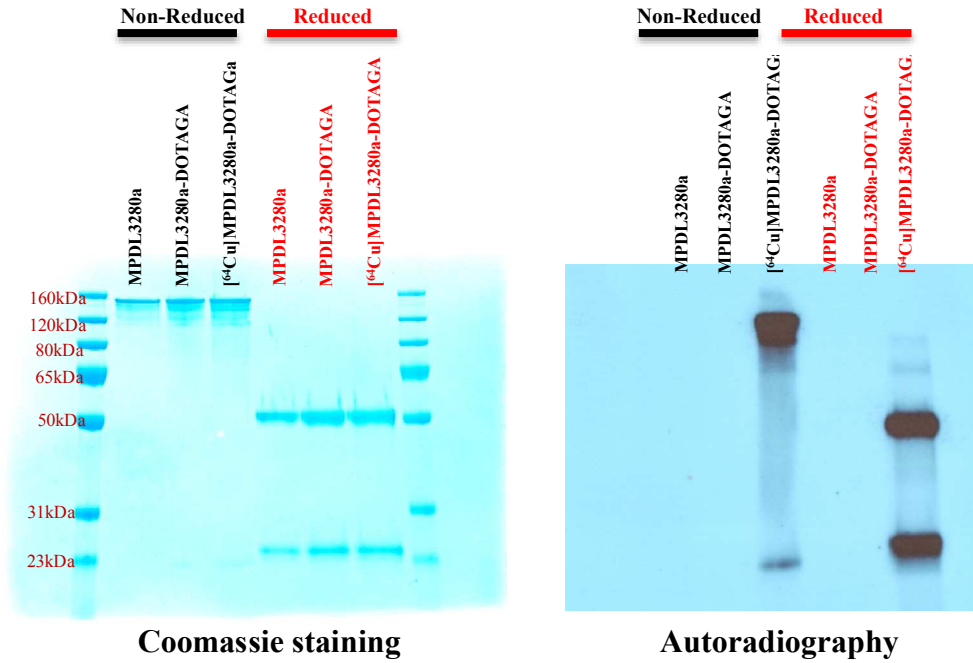

**Figure S2. Integrity of  $^{64}\text{Cu}$ atezolizumab.** Representative images of SDS-PAGE analysis and autoradiography of  $^{64}\text{Cu}$ atezolizumab confirming integrity of the antibody after radiolabeling.
